# Supplementary material for: Massively Parallel Sequencing Reveals an Accumulation of De Novo Mutations and an Activating Mutation of LPAR1 in a Patient with Metastatic Neuroblastoma
Source: PLOS journal article supplement (doi:10.1371/journal.pone.0077731), 2013-10-16
Supplement: S1 (10.1371/journal.pone.0077731.s001) [file journal.pone.0077731.s001]

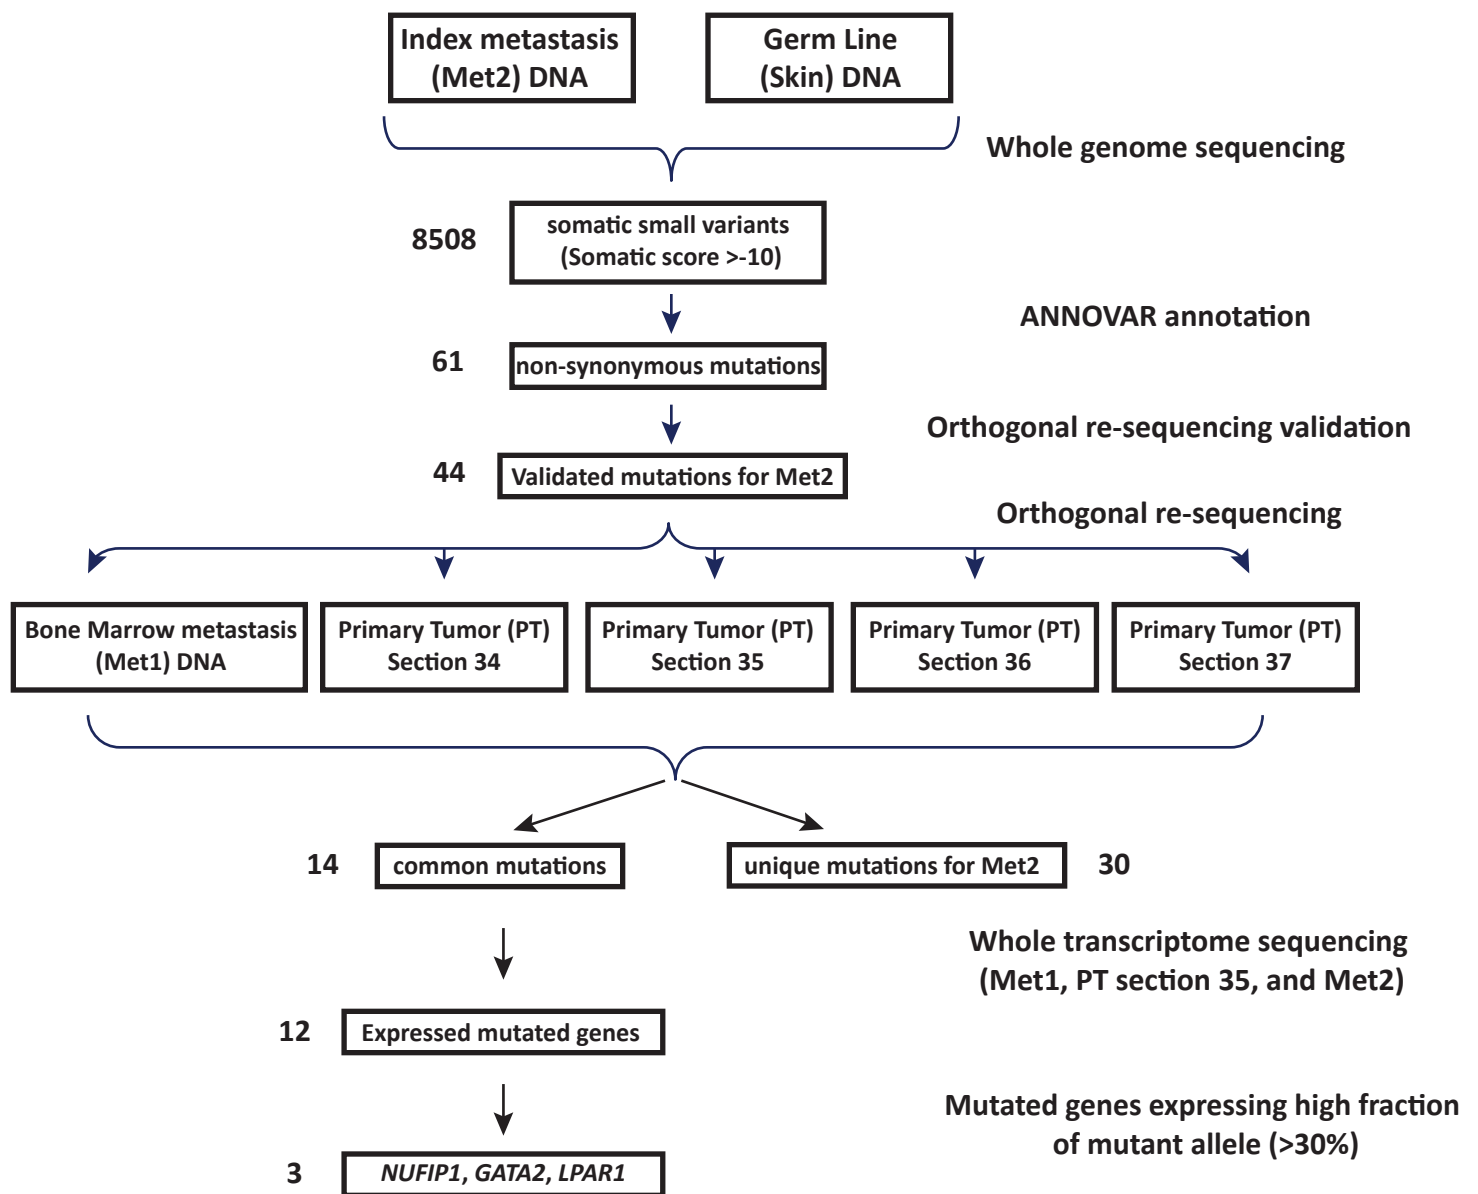

**Figure S1.** Flow diagram of next-generation sequencing experiments to identify expressed driver mutations in a patient with metastatic neuroblastoma. The numbers beside each box indicate number of small variants. Orthogonal re-sequencing includes Sanger and semiconductor sequencing.
