# Supplementary material for: Massively Parallel Sequencing Reveals an Accumulation of De Novo Mutations and an Activating Mutation of LPAR1 in a Patient with Metastatic Neuroblastoma
Source: PLOS journal article supplement (doi:10.1371/journal.pone.0077731), 2013-10-16
Supplement: S8 (10.1371/journal.pone.0077731.s008) [file journal.pone.0077731.s008]

**Table S6. Gene set enrichment analysis of the change of gene expression profiles in response to LPA (2 hours).**

| ID                                               | Size | ES       | NES       | nominal p | FDR       | Description                                                                                                                                                                                                                           |
|--------------------------------------------------|------|----------|-----------|-----------|-----------|---------------------------------------------------------------------------------------------------------------------------------------------------------------------------------------------------------------------------------------|
| MIL_PSEUDOPODIA_HAPTOTAXIS_UP                    | 408  | 0.296115 | 3.01573   | 0         | 0.0005    | Transcripts enriched in pseudopodia of NIH/3T3 cells (fibroblast) in response to haptotactic migratory stimulus by fibronectin, FN1 [Gene ID=2335].                                                                                   |
| MONNIER_POSTRADIATION_TUMOR_ESCAPE_UP            | 248  | 0.343568 | 2.77056   | 0.0001    | 0.00265   | The post-radiation tumor escape signature: genes up-regulated in tumors from irradiated stroma vs those from non-irradiated stroma.                                                                                                   |
| SWEET_LUNG_CANCER_KRAS_UP                        | 420  | 0.233234 | 2.42633   | 0.0001    | 0.0275667 | Genes up-regulated in the mouse lung cancer model with mutated KRAS [Gene ID=3845].                                                                                                                                                   |
| ICHIBA_GRAFT_VERSUS_HOST_DISEASE_35D_UP          | 116  | -0.38387 | -2.28866  | 0.0029    | 0.0882    | Hepatic graft versus host disease (GVHD), day 35: genes up-regulated in allogeneic vs syngeneic bone marrow transplant.                                                                                                               |
| YAO_TEMPORAL_RESPONSE_TO_PROGESTERONE_CLUSTER_14 | 74   | 0.443047 | 2.12916   | 0.0043    | 0.119533  | Genes co-regulated in uterus during a time course response to progesterone [PubChem=5994]: SOM cluster 14.                                                                                                                            |
| BYSTRYKH_HEMATOPOIESIS_STEM_CELL_QTL_TRANS       | 866  | 0.145075 | 2.09829   | 0.004     | 0.119533  | Transcripts in hematopoietic stem cells (HSC) which are cis-regulated (i.e., modulated by a QTL (quantitative trait locus) not in a close proximity to the gene).                                                                     |
| FOSTER_INFLAMMATORY_RESPONSE_LPS_DN              | 316  | 0.222761 | 2.00806   | 0.0053    | 0.16045   | Genes down-regulated by bacterial lipopolysaccharide (LPS) in non-tolerizable (NT class) macrophages, compared to the ???tolerizable??? (T class) ones.                                                                               |
| YAO_TEMPORAL_RESPONSE_TO_PROGESTERONE_CLUSTER_11 | 80   | 0.39436  | 1.94847   | 0.0101    | 0.16045   | Genes co-regulated in uterus during a time course response to progesterone [PubChem=5994]: SOM cluster 11.                                                                                                                            |
| BERENIENO_TRANSFORMED_BY_RHOA_UP                 | 435  | 0.184184 | 1.93854   | 0.0083    | 0.16045   | Genes up-regulated in NIH/3T3 cells (fibroblasts) transformed by expression of constitutively active (Q63L) form of RHOA [Gene ID=387] off plasmid vector.                                                                            |
| MIL_PSEUDOPODIA_HAPTOTAXIS_UP                    | 506  | 0.17242  | 1.93298   | 0.0075    | 0.16045   | Transcripts depleted from pseudopodia of NIH/3T3 cells (fibroblast) in response to haptotactic migratory stimulus by fibronectin, FN1 [Gene ID=2335].                                                                                 |
| MARTINEZ_RB1_TARGETS_UP                          | 753  | 0.140523 | 1.91148   | 0.0083    | 0.16045   | Genes up-regulated in mice with skin specific knockout of RB1 [Gene ID=5925] by Cre-lox.                                                                                                                                              |
| BERENIENO_KOC_SIGNALING_NOT_VIA_RHOA_DN          | 55   | 0.440236 | 1.89055   | 0.013     | 0.16045   | Genes down-regulated in NIH/3T3 cells (fibroblasts) after treatment with Y27632 [PubChem=123862], an inhibitor of ROCK proteins; the changes did not depend on expression of constitutively active (Q63L) form of RHOA [Gene ID=387]. |
| MCCULLG_DELTA_FOSB_TARGETS_BWK                   | 59   | 0.340979 | 1.8902    | 0.0154    | 0.16045   | Genes up-regulated in the nucleus accumbens (a major reward center in brain) 8 weeks after induction of DeltafosB, a FOSB [Gene ID=2354] splice variant.                                                                              |
| YAO_TEMPORAL_RESPONSE_TO_PROGESTERONE_CLUSTER_16 | 87   | -0.3675  | -1.88131  | 0.0133    | 0.16045   | Genes co-regulated in uterus during a time course response to progesterone [PubChem=5994]: SOM cluster 16.                                                                                                                            |
| PASQUALUCCO_LYMPHOMA_BY_GC_STAGE_UP              | 181  | 0.26373  | 1.8545    | 0.0123    | 0.16968   | Genes up-regulated in post-GC, BCL6 [Gene ID=604] dependent B cell non-Hodgkin's lymphoma (B-NHL) vs MYC [Gene ID=4609] driven pre-GC lymphoma; GC = germinal center.                                                                 |
| BERENIENO_TRANSFORMED_BY_RHOA_DN                 | 385  | -0.1791  | -1.77603  | 0.0176    | 0.224841  | Genes down-regulated in NIH/3T3 cells (fibroblasts) transformed by expression of constitutively active (Q63L) form of RHOA [Gene ID=387] off plasmid vector.                                                                          |
| MCMURRAY_TP53_HRAS_COOPERATION_RESPONSE_DN       | 49   | -0.42592 | -1.76496  | 0.0232    | 0.224841  | Down-regulated "cooperation" response genes: responded synergistically to the combination of mutant TP53 [Gene ID=7157] and HRAS [Gene ID=3265] in YAMC cells (colon).                                                                |
| KENNY_CTNB1_TARGETS_DN                           | 66   | 0.378515 | 1.73786   | 0.0292    | 0.231579  | Genes down-regulated in HCL1 cells (mammary epithelium) by expression of constantly active CTNNB1 [Gene ID=1499].                                                                                                                     |
| IVANAGA_CARCINOGENESIS_BY_KRAS_UP                | 156  | 0.264002 | 1.73266   | 0.0225    | 0.231579  | Cluster 3: genes up-regulated in lung tissue samples from mice with tumor-bearing genotypes (activated KRAS [Gene ID=3845] alone or together with inactivated PTEN [Gene ID=5728]).                                                   |
| SEKI_INFLAMMATORY_RESPONSE_LPS_UP                | 72   | 0.359582 | 1.70975   | 0.0325    | 0.242062  | Genes up-regulated in hepatic stellar cells after stimulation with bacterial lipopolysaccharide (LPS).                                                                                                                                |
| QUJELT_OVARIAN_CANCER_INVASIVE_VS_LMP_UP         | 138  | 0.271968 | 1.69945   | 0.0288    | 0.242062  | Genes up-regulated in epithelial ovarian cancer (EOC) biopsies: invasive (TOV) vs low malignant potential (LMP) tumors.                                                                                                               |
| MCBRYAN_PUBERTAL_BREAST_6_7WK_DN                 | 74   | 0.34882  | 1.67759   | 0.0357    | 0.252345  | Genes down-regulated in pubertal mammary gland development between week 6 and 7.                                                                                                                                                      |
| SWEET_LUNG_CANCER_KRAS_DN                        | 411  | 0.162041 | 1.65534   | 0.033     | 0.25613   | Genes down-regulated in the mouse lung cancer model with mutated KRAS [Gene ID=3845].                                                                                                                                                 |
| ZHANG_BREAST_CANCER_PROGENITORS_UP               | 279  | 0.192776 | 1.63715   | 0.0363    | 0.271865  | Genes changed in cancer stem cells isolated from mammary tumors compared to the non-tumorigenic cells.                                                                                                                                |
| MIL_PSEUDOPODIA_HAPTOTAXIS_DN                    | 436  | 0.154857 | 1.62725   | 0.0361    | 0.271865  | Transcripts depleted in pseudopodia of NIH/3T3 cells (fibroblast) in response to the chemotactic migration stimulus by lysophosphatidic acid (LPA) [PubChem=3988].                                                                    |
| MORI_SMALL_PRE_BIL_LYMPHOCTYTE_DN                | 58   | 0.372423 | 1.62072   | 0.0434    | 0.271865  | Down-regulated genes in the B lymphocyte developmental signature, based on expression profiling of lymphomas from the Emu-myc transgenic mice: the Small Pre-B cell stage.                                                            |
| RAMALHO_STEMNESS_DN                              | 75   | 0.329106 | 1.59159   | 0.0452    | 0.271865  | Genes depleted in embryonic, neural and hematopoietic stem cells.                                                                                                                                                                     |
| MARTINEZ_TP53_TARGETS_DN                         | 631  | 0.121102 | 1.51625   | 0.0666    | 0.337939  | Genes down-regulated in mice with skin specific knockout of TP53 [Gene ID=7157].                                                                                                                                                      |
| BOYLAN_MULTIPLE_MYELOMA_D_DN                     | 61   | -0.34153 | -1.51611  | 0.0658    | 0.337939  | Genes down-regulated in group D of tumors arising from overexpression of BCL2L1 and MYC [Gene ID=598, 4609] in plasma cells.                                                                                                          |
| HOFFMANN_LARGE_TO_SMALL_PRE_BIL_LYMPHOCTYTE_UP   | 69   | -0.32381 | -1.51127  | 0.0618    | 0.337939  | Genes up-regulated during differentiation from large Pre-Bil to small Pre-Bil lymphocyte.                                                                                                                                             |
| MARTINEZ_RB1_AND_TP53_TARGETS_DN                 | 623  | 0.121844 | 1.50836   | 0.0669    | 0.337939  | Genes down-regulated in mice with skin specific double knockout of both RB1 and TP53 [Gene ID=5925, 7157] by Cre-lox.                                                                                                                 |
| LE_EGR2_TARGETS_DN                               | 106  | 0.271236 | 1.50499   | 0.0675    | 0.337939  | Genes up-regulated in P14 nerves of transgenic mice having hypomorphic (reduced function) allele of EGR2 [Gene ID=1959].                                                                                                              |
| RIZ_ERYTHROID_DIFFERENTIATION                    | 79   | -0.30562 | -1.50319  | 0.0696    | 0.337939  | Selected gradually up-regulated genes in the TLX1 [Gene ID=3195] Tet On IEHx15-4 cells (pro-erythroblasts).                                                                                                                           |
| KUNINGER_IGF1_VS_PDGF_TARGETS_UP                 | 54   | 0.352854 | 1.49582   | 0.0734    | 0.337939  | Genes up-regulated in C2A512 cells (myoblast) by IGF1 [Gene ID=3479] vs PDGFB [Gene ID=5155].                                                                                                                                         |
| RIZ_ERYTHROID_DIFFERENTIATION_OHRR               | 40   | 0.393513 | 1.49164   | 0.0893    | 0.337939  | Selected genes down-regulated in the TLX1 [Gene ID=3195] Tet On IEHx15-4 cells (pro-erythroblasts) at 6 h time point.                                                                                                                 |
| MARTORIATI_MDMA_TARGETS_FETAL_LIVER_UP           | 90   | 0.268686 | 1.48689   | 0.0692    | 0.337939  | Genes up-regulated in non-apoptotic tissues (fetal liver) after MDMA [Gene ID=4194] knockout.                                                                                                                                         |
| GOLDRATH_ANTIGEN_RESPONSE                        | 22   | 0.17219  | 1.46456   | 0.078     | 0.342515  | Genes up-regulated at the peak of an antigen response of naive CD8+ [Gene ID=925, 926] T-cells.                                                                                                                                       |
| LEE_LIVER_CANCER_MYC_DN                          | 40   | 0.383528 | 1.46223   | 0.0982    | 0.342515  | Genes down-regulated in hepatocellular carcinoma (HCC) induced by overexpression of MYC [Gene ID=4609].                                                                                                                               |
| MCCULLG_CREB1_TARGETS_UP                         | 100  | -0.27091 | -1.46083  | 0.081     | 0.342515  | Genes up-regulated in the nucleus accumbens (a major reward center in the brain) 8 weeks after induction of CREB1 [Gene ID=1385] expression in a transgenic Tet-Off system.                                                           |
| MCBRYAN_PUBERTAL_BREAST_5_6WK_UP                 | 91   | 0.278513 | 1.45568   | 0.0782    | 0.342515  | Genes up-regulated during pubertal mammary gland development between week 5 and 6.                                                                                                                                                    |
| ZHANG_BREAST_CANCER_PROGENITORS_DN               | 104  | 0.262556 | 1.45097   | 0.0796    | 0.342515  | Genes changed in cancer stem cells isolated from mammary tumors compared to the non-tumorigenic cells.                                                                                                                                |
| MARTORIATI_MDMA_TARGETS_NEUROEPITHELIUM_UP       | 89   | 0.277834 | 1.43045   | 0.0837    | 0.350725  | Genes up-regulated in neuroepithelium after MDMA [Gene ID=4194] knockout.                                                                                                                                                             |
| LEE_LIVER_CANCER_MYC_UP                          | 72   | 0.30115  | 1.43086   | 0.0896    | 0.350725  | Genes up-regulated in hepatocellular carcinoma (HCC) induced by overexpression of MYC [Gene ID=4609].                                                                                                                                 |
| STARK_PREFRONTAL_CORTX_22Q11_DELETION_DN         | 410  | -0.13959 | -1.42734  | 0.0964    | 0.350725  | Genes down-regulated in prefrontal cortex (PFC) of mice carrying a hemizygotic microdeletion in the 22q11.2 region.                                                                                                                   |
| YAO_TEMPORAL_RESPONSE_TO_PROGESTERONE_CLUSTER_13 | 61   | -0.22569 | -1.41504  | 0.0921    | 0.359831  | Genes co-regulated in uterus during a time course response to progesterone [PubChem=5994]: SOM cluster 13.                                                                                                                            |
| CADWELL_ATG16L1_TARGETS_UP                       | 143  | 0.311445 | 1.40658   | 0.0942    | 0.363365  | Genes up-regulated in Paneth cell (part of intestinal epithelium) of mice with hypomorphic (reduced function) form of ATG16L1 [Gene ID=55054].                                                                                        |
| MATSUDA_NATURAL_KILLER_DIFFERENTIATION           | 437  | 0.132308 | 1.39746   | 0.1069    | 0.363365  | Genes changed between developmental stages of Valpha14 natural killer T lymphocyte cells (NKT).                                                                                                                                       |
| STEARMAN_LUNG_CANCER_EARLY_VS_LATE_UP            | 96   | 0.26103  | 1.39604   | 0.1038    | 0.363365  | Genes classifying non-tumor lung tissues by age after incution of lung cancer by urethane injection [PubChem=5641]: early (24-26 weeks) vs late (46 weeks).                                                                           |
| MCBRYAN_PUBERTAL_BREAST_4_5WK_DN                 | 222  | 0.180093 | 1.38222   | 0.1076    | 0.368314  | Genes down-regulated during pubertal mammary gland development between week 4 and 5.                                                                                                                                                  |
| RAMALHO_STEMNESS_UP                              | 166  | 0.207446 | 1.38123   | 0.1061    | 0.368314  | Genes enriched in embryonic, neural and hematopoietic stem cells.                                                                                                                                                                     |
| IVANAGA_CARCINOGENESIS_BY_KRAS_DN                | 111  | 0.242292 | 1.37695   | 0.1044    | 0.368314  | Cluster 4: genes down-regulated in lung tissue samples from mice with tumor-bearing genotypes (activated KRAS [Gene ID=3845] alone or together with inactivated PTEN [Gene ID=5728]).                                                 |
| YAO_TEMPORAL_RESPONSE_TO_PROGESTERONE_CLUSTER_17 | 150  | -0.21179 | -1.37695  | 0.1136    | 0.377685  | Genes during a time course response to progesterone [PubChem=5994]: SOM cluster 17.                                                                                                                                                   |
| LIN_NP4A_TARGETS_UP                              | 103  | 0.238698 | 1.31508   | 0.1342    | 0.448391  | Genes up-regulated in neurons after NP4A [Gene ID=266743] knockdown by RNAi.                                                                                                                                                          |
| MARKEY_RB1_CHRONIC_LOF_UP                        | 112  | -0.22914 | -1.31146  | 0.1397    | 0.448391  | Genes up-regulated in MEF cells (embryonic fibroblasts) isolated from RB1 [Gene ID=5925] knockout mice: chronic loss of function (LOF) of RB1.                                                                                        |
| RASHI_RESPONSE_TO_IONIZING_RADIATION_2           | 127  | 0.213597 | 1.28658   | 0.1554    | 0.476646  | Cluster 2: late ATM [Gene ID=472] dependent genes induced by ionizing radiation treatment.                                                                                                                                            |
| BOYLAN_MULTIPLE_MYELOMA_PCAL_UP                  | 114  | 0.222687 | 1.28518   | 0.1491    | 0.476646  | Top up-regulated genes from principal component 1 (PCA1) which captures variation between normal plasma cells and tumors arising from aberrant expression of BCL2L1 and MYC [Gene ID=598, 4609].                                      |
| YAO_TEMPORAL_RESPONSE_TO_PROGESTERONE_CLUSTER_10 | 52   | -0.30564 | -1.28116  | 0.1716    | 0.476646  | Genes co-regulated in uterus during a time course response to progesterone [PubChem=5994]: SOM cluster 10.                                                                                                                            |
| MCCULLG_DELTA_FOSB_TARGETS_ZWK                   | 62   | 0.282547 | 1.26883   | 0.1692    | 0.4836    | Genes up-regulated in the nucleus accumbens (a major reward center in brain) 2 weeks after induction of DeltafosB, a FOSB [Gene ID=2354] splice variant.                                                                              |
| ICHIBA_GRAFT_VERSUS_HOST_DISEASE_D7_DN           | 40   | -0.33365 | -1.26733  | 0.1957    | 0.4836    | Hepatic graft versus host disease (GVHD), day 7: down-regulated in allogeneic vs syngeneic bone marrow transplant.                                                                                                                    |
| MCBRYAN_PUBERTAL_BREAST_6_7WK_UP                 | 242  | 0.158243 | 1.26178   | 0.1793    | 0.4836    | Genes up-regulated during pubertal mammary gland development between week 6 and 7.                                                                                                                                                    |
| STARK_PREFRONTAL_CORTX_22Q11_DELETION_UP         | 179  | -0.17983 | -1.25697  | 0.1767    | 0.4836    | Genes up-regulated in prefrontal cortex (PFC) of mice carrying a hemizygotic microdeletion in the 22q11.2 region.                                                                                                                     |
| MIL_PSEUDOPODIA_HAPTOTAXIS_UP                    | 67   | 0.272417 | 1.25501   | 0.1731    | 0.4836    | Transcripts enriched in pseudopodia of NIH/3T3 cells (fibroblast) in response to the chemotactic migration stimulus by lysophosphatidic acid (LPA) [PubChem=3988].                                                                    |
| MCCULLG_CREB1_TARGETS_DN                         | 62   | 0.297896 | 1.24723   | 0.1935    | 0.489849  | Genes down-regulated in the nucleus accumbens (a major reward center in the brain) 8 weeks after induction of CREB1 [Gene ID=1385] expression in a transgenic Tet-Off system.                                                         |
| LEE_TARGETS_OF_PTCH1_AND_SUFU_DN                 | 50   | -0.27904 | -1.23377  | 0.1951    | 0.506861  | Genes down-regulated in medulloblastoma tumors from animals with inactivating mutations of one copy of PTCH1 or SUFU [Gene ID=5727, 51684] in conjunction with TP53 [Gene ID=7157] loss.                                              |
| YAO_TEMPORAL_RESPONSE_TO_PROGESTERONE_CLUSTER_7  | 56   | 0.284296 | 1.22002   | 0.2098    | 0.525043  | Genes co-regulated in uterus during a time course response to progesterone [PubChem=5994]: SOM cluster 7.                                                                                                                             |
| RIZ_ERYTHROID_DIFFERENTIATION_CN01               | 41   | -0.31331 | -1.20805  | 0.2331    | 0.537906  | Selected gradually up-regulated genes whose expression profile follows that of CCNE1 [Gene ID=898] in the TLX1 [Gene ID=3195] Tet On IEHx15-4 cells (pro-erythroblasts).                                                              |
| MORI_LARGE_PRE_BIL_LYMPHOCTYTE_UP                | 51   | -0.28915 | -1.20504  | 0.2229    | 0.537906  | Up-regulated genes in the B lymphocyte developmental signature, based on expression profiling of lymphomas from the Emu-myc transgenic mice: the Large Pre-B cell stage.                                                              |
| KUMAR_TARGETS_OF_MLL_A9_FUSION                   | 347  | 0.125449 | 1.18913   | 0.2433    | 0.561218  | Myeloid leukemia model in mice with germ-line MLL-A9 fusion knock-in [Gene ID=4297, 4300]; genes changed in comparison among the leukemic, preleukemic and wild-type animals.                                                         |
| MARTINEZ_RB1_TARGETS_DN                          | 549  | -0.0996  | -1.16809  | 0.2652    | 0.584472  | Genes up-regulated in mice with skin specific knockout of RB1 [Gene ID=5925] by Cre-lox.                                                                                                                                              |
| FOSTER_INFLAMMATORY_RESPONSE_LPS_UP              | 157  | 0.176784 | 1.16628   | 0.2451    | 0.584472  | Genes up-regulated by bacterial lipopolysaccharide (LPS) in non-tolerizable (NT class) macrophages, compared to the ???tolerizable??? (T class) ones.                                                                                 |
| LEE_TARGETS_OF_PTCH1_AND_SUFU_UP                 | 102  | 0.214337 | 1.16577   | 0.2371    | 0.584472  | Genes up-regulated in medulloblastoma tumors from animals with inactivating mutations of one copy of PTCH1 or SUFU [Gene ID=5727, 51684] in conjunction with TP53 [Gene ID=7157] loss.                                                |
| IVANOVA_HEMATOPOIESIS_STEM_CELL_LONG_TERM        | 77   | -0.23349 | -1.13384  | 0.2667    | 0.614547  | Genes in the expression cluster "LT-HSC Shared": up-regulated in long term hematopoietic stem cells (LT-HSC) from adult bone marrow and fetal liver.                                                                                  |
| YAO_TEMPORAL_RESPONSE_TO_PROGESTERONE_CLUSTER_9  | 73   | -0.23718 | -1.13087  | 0.2705    | 0.614547  | Genes co-regulated in uterus during a time course response to progesterone [PubChem=5994]: SOM cluster 9.                                                                                                                             |
| IVANOVA_HEMATOPOIESIS_MATURE_CELL                | 119  | -0.19156 | -1.11912  | 0.2795    | 0.614547  | Genes in the expression cluster "MBC Shared": up-regulated in mature blood cell populations from adult bone marrow and fetal liver.                                                                                                   |
| BYSTRYKH_HEMATOPOIESIS_STEM_CELL_QTL_CS          | 123  | 0.187883 | 1.11684   | 0.2831    | 0.614547  | Transcripts in hematopoietic stem cells (HSC) which are cis-regulated (i.e., modulated by a QTL (quantitative trait locus) in close proximity to the gene).                                                                           |
| TSENG_IRS1_TARGETS_DN                            | 113  | 0.192891 | 1.10469   | 0.2941    | 0.614547  | Down-regulated in brown preadipocytes with IRS1 [Gene ID=3667] knockout vs wild type controls; the knockouts have severe defects in adipocyte differentiation.                                                                        |
| LIN_NP4A_TARGETS_DN                              | 57   | 0.255678 | 1.10457   | 0.3092    | 0.614547  | Genes down-regulated in neurons after NP4A [Gene ID=266743] knockdown by RNAi.                                                                                                                                                        |
| LEE_LIVER_CANCER_EZF1_DN                         | 53   | 0.261733 | 1.10226   | 0.3179    | 0.614547  | Genes down-regulated in hepatocellular carcinoma (HCC) induced by overexpression of EZF1 [Gene ID=18609].                                                                                                                             |
| COATES_MACROPHAGE_M1_VS_M2_DN                    | 88   | 0.213299 | 1.10136   | 0.3021    | 0.614547  | Down-regulated genes distinguishing between M1 (pro-inflammatory) and M2 (anti-inflammatory) macrophage subtypes.                                                                                                                     |
| RASHI_RESPONSE_TO_IONIZING_RADIATION_5           | 135  | 0.178205 | 1.09862   | 0.3064    | 0.614547  | Cluster 5: early response genes activated in ATM [Gene ID=472] deficient but not in the wild type tissues.                                                                                                                            |
| BOYLAN_MULTIPLE_MYELOMA_C_D_DN                   | 217  | 0.143952 | 1.09829   | 0.332     | 0.614547  | Genes down-regulated both in group C and D of tumors arising from overexpression of BCL2L1 and MYC [Gene ID=598, 4609] in plasma cells.                                                                                               |
| IVANOVA_HEMATOPOIESIS_STEM_CELL_AND_PROGENITOR   | 214  | 0.145211 | 1.09709   | 0.326     | 0.614547  | Genes in the expression cluster "HSC and Progenitors Shared": up-regulated in hematopoietic stem cells (HSC) and progenitors from adult bone marrow and fetal liver.                                                                  |
| MARSON_FOXP3_TARGETS_DN                          | 59   | 0.250317 | 1.09675   | 0.3152    | 0.614547  | Genes down-regulated by FOXP3 [Gene ID=50943] in both ex vivo and hybridoma cells.                                                                                                                                                    |
| BOYLAN_MULTIPLE_MYELOMA_C_DN                     | 44   | 0.274718 | 1.08225   | 0.336     | 0.653045  | Genes down-regulated in group C of tumors arising from overexpression of BCL2L1 and MYC [Gene ID=598, 4609] in plasma cells.                                                                                                          |
| PASQUALUCCO_LYMPHOMA_BY_GC_STAGE_DN              | 63   | 0.24034  | 1.08092   | 0.3311    | 0.653045  | Genes up-regulated in P14 nerves of transgenic mice having hypomorphic (reduced function) allele of EGR2 [Gene ID=1959].                                                                                                              |
| UEDA_PERIPHERAL_CLOCK                            | 133  | 0.174918 | 1.07423   | 0.3312    | 0.660017  | Genes down-regulated in post-GC, BCL6 [Gene ID=604] dependent B cell non-Hodgkin's lymphoma (B-NHL) vs MYC [Gene ID=4609] driven pre-GC lymphoma; GC = germinal center.                                                               |
| MARTINEZ_RB1_AND_TP53_TARGETS_UP                 | 114  | -0.18115 | -1.07456  | 0.3599    | 0.714516  | Molecule of 162 kDa encoding genes (182 and 202 kDa) in the peripheral blood.                                                                                                                                                         |
| GOLDRATH_HOMEOSTATIC_PROLIFERATION               | 646  | 0.083034 | 1.04103   | 0.3954    | 0.718642  | Genes up-regulated in mice with skin specific double knockout of both RB1 and TP53 [Gene ID=5925, 7157] by Cre-lox.                                                                                                                   |
| HESS_TARGETS_OF_HOXA9_AND_MEIS1_UP               | 93   | 0.195879 | 1.02955   | 0.3821    | 0.720593  | Up-regulated in NIH/3T3 T lymphocytes undergoing homeostatic proliferation (HP) versus the naive cells; these genes are not up-regulated versus effector or memory cell population.                                                   |
| LIN_LIPA_TARGETS_3M                              | 62   | 0.330048 | 1.02949   | 0.3879    | 0.720593  | Genes up-regulated at 3 months of age in lungs from LIPA [Gene ID=3988] knockout mice, which display pulmonary pathology.                                                                                                             |
| YU_MYC_TARGETS_DN                                | 52   | 0.243401 | 1.02075   | 0.4077    | 0.732312  | Genes up-regulated in B cell lymphoma tumors expressing an activated form of MYC [Gene ID=4609].                                                                                                                                      |
| LEE_LIVER_CANCER_DENa_UP                         | 65   | 0.219746 | 1.00413   | 0.4258    | 0.743237  | Genes up-regulated in hepatocellular carcinoma (HCC) induced by diethylnitrosamine (DENa) [PubChem=5921].                                                                                                                             |
| MORI_EMU_MYC_LYMPHOMA_BY_ONSET_TIME_UP           | 101  | 0.183995 | 1.00364   | 0.4142    | 0.743237  | Genes correlated with the early tumor onset in the Emu-myc transgenic mouse lymphoma model.                                                                                                                                           |
| IVANOVA_HEMATOPOIESIS_STEM_CELL                  | 71   | 0.124222 | 1.00349   | 0.423     | 0.743237  | Genes in the expression cluster "HSC Shared": up-regulated in hematopoietic stem cells (HSC) from adult bone marrow and fetal liver.                                                                                                  |
| CAIRO_LIVER_DEVELOPMENT_UP                       | 151  | 0.155501 | 1.00198   | 0.4268    | 0.743237  | Genes up-regulated at early fetal liver stage [embryonic days E11.5 - E12.5] compared to the late fetal liver stage [embryonic days E14.5 - E16.5].                                                                                   |
| IVANAGA_CARCINOGENESIS_BY_KRAS_PTFEN_DN          | 314  | 0.110256 | 0.99826   | 0.4479    | 0.743897  | Cluster 2: genes down-regulated in lung tissue samples from mice with oncogenic form of KRAS [Gene ID=3845] and inactivated PTEN [Gene ID=5728].                                                                                      |
| MCBRYAN_PUBERTAL_BREAST_3_4WK_UP                 | 178  | -0.14282 | -0.993534 | 0.4473    | 0.746881  | Genes up-regulated during pubertal mammary gland development between weeks 3 and 4.                                                                                                                                                   |
| GOLDRATH_IMMUNE_MEMORY                           | 46   | 0.244443 | 0.977589  | 0.4536    | 0.770125  | "Memory genes" expressed uniquely in CD8+ [Gene ID=925] memory T lymphocytes (compared with effector or na77ve cells).                                                                                                                |
| LIN_LIPA_TARGETS_6M                              | 81   | 0.19638  | 0.976318  | 0.4587    | 0.770125  | Genes up-regulated at 6 months of age in lungs from LIPA [Gene ID=3988] knockout mice, which display pulmonary pathology.                                                                                                             |
| MCBRYAN_PUBERTAL_BREAST_5_6WK_DN                 | 159  | -0.14553 | -0.969005 | 0.4776    | 0.778699  | Genes down-regulated during pubertal mammary gland development between week 5 and 6.                                                                                                                                                  |
| GERY_CEBP_TARGETS                                | 92   | 0.18209  | 0.960757  | 0.4866    | 0.787587  | Genes changed in NIH 3T3 cells [embryonic fibroblast] by expression of one or more of C/EBP proteins: CEBPA, CEBPB, CEBPG, and CEBPD [Gene ID=1050, 1051, 1054, 1052].                                                                |

|                                                       |     |          |           |        |          |                                                                                                                                                                                                                             |
|-------------------------------------------------------|-----|----------|-----------|--------|----------|-----------------------------------------------------------------------------------------------------------------------------------------------------------------------------------------------------------------------------|
| COATES_MACROPHAGE_M1_V5_M2_UP                         | 60  | -0.21674 | -0.957892 | 0.4858 | 0.787587 | Up-regulated genes distinguishing between M1 (pro-inflammatory) and M2 (anti-inflammatory) macrophage subtypes.                                                                                                             |
| KENNY_CTNNB1_TARGETS_UP                               | 34  | 0.262754 | 0.946836  | 0.4801 | 0.787587 | Genes up-regulated in HCL1 cells (mammary epithelium) by expression of constantly active CTNNB1 [Gene ID=1499].                                                                                                             |
| IVANOVA_HEMATOPOIESIS_EARLY_PROGENITOR                | 66  | 0.205208 | 0.939467  | 0.5088 | 0.787587 | Genes in the expression cluster 'Early Progenitors Shared': up-regulated in hematopoietic progenitors from adult bone marrow and from fetal liver.                                                                          |
| BYSTRYKH_HEMATOPOIESIS_STEM_CELL_AND_BRAIN_QTL_CIS    | 57  | 0.21745  | 0.937778  | 0.5128 | 0.787587 | Genes associated with the same cis-regulatory QTL (quantitative trait loci) in both brain and hematopoietic stem cells (HSC).                                                                                               |
| MARSON_FOXP3_TARGETS_UP                               | 63  | 0.208046 | 0.936079  | 0.5175 | 0.787587 | Genes up-regulated by FOXP3 [Gene ID=50943] in both ex vivo and hybridoma cells.                                                                                                                                            |
| MORI_PRE_B_LYMPHOCYTE_DN                              | 57  | 0.214417 | 0.931381  | 0.5253 | 0.787587 | Down-regulated genes in the B lymphocyte developmental signature, based on expression profiling of lymphomas from the Emu-myc transgenic mice: the Pre-B1 stage.                                                            |
| LEE_LIVER_CANCER_MYC_E2F1_DN                          | 45  | 0.234531 | 0.930558  | 0.5169 | 0.787587 | Genes down-regulated in hepatocellular carcinoma (HCC) from MYC and E2F1 [Gene ID=4609, 1869] double transgenic mice.                                                                                                       |
| STEARMAN_LUNG_CANCER_EARLY_V5_LATE_DN                 | 60  | 0.211352 | 0.923577  | 0.5304 | 0.787587 | Genes classifying non-tumor lung tissues by age after incision of lung cancer by urethane injection [PubChem=5641]: early (24-26 weeks) vs late (46 weeks).                                                                 |
| MARTINEZ_TP53_TARGETS_UP                              | 642 | 0.073342 | 0.923007  | 0.5439 | 0.787587 | Genes up-regulated in mice with skin specific knockout of TP53 [Gene ID=7157].                                                                                                                                              |
| BOYLAN_MULTIPLE_MYELOMA_PC3A_UP                       | 49  | -0.22589 | -0.922796 | 0.5301 | 0.787587 | Top up-regulated genes from principal component 3 (PCA3) which captures variation among different plasma cell tumors arising from overexpression of BCL2L1 and MYC [Gene ID=598, 4609].                                     |
| MARTORIATI_MDMA_TARGETS_FETAL_LIVER_DN                | 316 | 0.101566 | 0.918584  | 0.5569 | 0.787587 | Genes down-regulated in non-apoptotic tissues (fetal liver) after MDMA [Gene ID=4194] knockout.                                                                                                                             |
| BOYLAN_MULTIPLE_MYELOMA_D_UP                          | 59  | -0.20845 | -0.915446 | 0.5427 | 0.787587 | Genes up-regulated in group D of tumors arising from overexpression of BCL2L1 and MYC [Gene ID=598, 4609] in plasma cells.                                                                                                  |
| YAUCH_HEDGEHOG_SIGNALING_PARACRINE_UP                 | 136 | 0.146448 | 0.911781  | 0.5611 | 0.787587 | Genes up-regulated in mouse stroma of pancreatic adenocarcinoma xenografts after treatment with hhAntag, a hedgehog (Hh) pathway inhibitor.                                                                                 |
| MORI_SMALL_PRE_BIL_LYMPHOCYTE_UP                      | 59  | -0.20884 | -0.911725 | 0.5532 | 0.787587 | Up-regulated genes in the B lymphocyte developmental signature, based on expression profiling of lymphomas from the Emu-myc transgenic mice: the Small Pre-B1 stage.                                                        |
| YAUCH_HEDGEHOG_SIGNALING_PARACRINE_DN                 | 265 | 0.109069 | 0.908442  | 0.5723 | 0.787587 | Genes down-regulated in mouse stroma of pancreatic adenocarcinoma xenografts after treatment with HhAntag, a hedgehog (Hh) pathway inhibitor.                                                                               |
| ICHIBA_GRAFT_VERSUS_HOST_DISEASE_07_UP                | 95  | 0.170693 | 0.90611   | 0.5653 | 0.787587 | Hepatic graft versus host disease (GVHD), day 7: up-regulated in allogeneic vs syngeneic bone marrow transplant.                                                                                                            |
| IVANOVA_HEMATOPOIESIS_LATE_PROGENITOR                 | 114 | 0.157008 | 0.904187  | 0.5734 | 0.787587 | Genes in the expression cluster 'Late Progenitors Shared': up-regulated in hematopoietic late progenitor cells from adult bone marrow and fetal liver.                                                                      |
| MCBRAY_PUBERTAL_BREAST_4_SWK_UP                       | 227 | 0.116129 | 0.901994  | 0.584  | 0.787587 | Genes up-regulated during pubertal mammary gland development between week 4 and 5.                                                                                                                                          |
| LEE_LIVER_CANCER_ACOX1_UP                             | 46  | 0.221864 | 0.890408  | 0.5696 | 0.800478 | Genes up-regulated in hepatocellular carcinoma of ACOX1 [Gene ID=51] knockout mice.                                                                                                                                         |
| CHESLER_BRAIN_QTL_CIS                                 | 69  | 0.189935 | 0.883797  | 0.5874 | 0.800478 | Best cis-regulated quantitative trait loci (QTLs) in the mouse genome which modulate transcription in brain tissue.                                                                                                         |
| YAO_TEMPORAL_RESPONSE_TO_PROGESTERONE_CLUSTER_1       | 61  | -0.19936 | -0.881343 | 0.5918 | 0.800478 | Genes co-regulated in uterus during a time course response to progesterone [PubChem=5994]: SOM cluster 1.                                                                                                                   |
| TSENG_IRS1_TARGETS_UP                                 | 119 | 0.15087  | 0.880564  | 0.6127 | 0.800478 | Up-regulated in brown preadipocytes with IRS1 [Gene ID=3667] knockout vs wild type controls; the knockouts have severe defects in adipocyte differentiation.                                                                |
| HESS_TARGETS_OF_HOXA9_AND_MEIS1_DN                    | 87  | 0.171765 | 0.879315  | 0.6106 | 0.800478 | Genes down-regulated in hematopoietic precursor cells conditionally expressing HOXA9 and MEIS1 [Gene ID=3205, 4211].                                                                                                        |
| MORI_LARGE_PRE_BIL_LYMPHOCYTE_DN                      | 45  | 0.2193   | 0.870651  | 0.5968 | 0.811048 | Down-regulated genes in the B lymphocyte developmental signature, based on expression profiling of lymphomas from the Emu-myc transgenic mice: the Large Pre-B1 stage.                                                      |
| PAL_PRMT5_TARGETS_UP                                  | 200 | -0.1171  | -0.85898  | 0.6379 | 0.826388 | Genes up-regulated in NIH-3T3 cells (fibroblast) after knockdown of PRMT5 [Gene ID=10419] by RNAi.                                                                                                                          |
| MARKEY_RB1_ACUTE_LOF_UP                               | 218 | 0.112636 | 0.856171  | 0.6474 | 0.826388 | Genes up-regulated in adult fibroblasts with inactivated RB1 [Gene ID=5925] by Cre-lox: acute loss of function (LOF) of RB1.                                                                                                |
| LIANG_HEMATOPOIESIS_STEM_CELL_NUMBER_LARGE_V5_TINY_UP | 46  | 0.212547 | 0.849508  | 0.6292 | 0.827286 | Genes up-regulated in LSK cells (bone marrow) as a function of a QTL for the size of hematopoietic stem cell (HSC) population: comparison of congenic B.D. chr3 (BD, large HSC size) vs parental B6 strain (tiny HSC size). |
| RASHI_RESPONSE_TO_IONIZING_RADIATION_3                | 48  | 0.207165 | 0.847798  | 0.632  | 0.827286 | Cluster 3: genes activated by ionizing radiation regardless of ATM [Gene ID=472] status.                                                                                                                                    |
| YAO_TEMPORAL_RESPONSE_TO_PROGESTERONE_CLUSTER_0       | 66  | -0.18492 | -0.843646 | 0.6616 | 0.827286 | Genes co-regulated in uterus during a time course response to progesterone [PubChem=5994]: SOM cluster 0.                                                                                                                   |
| MORI_IMMATURE_B_LYMPHOCYTE_UP                         | 40  | 0.219309 | 0.842404  | 0.6372 | 0.827286 | Up-regulated genes in the B lymphocyte developmental signature based on expression profiling of lymphomas from the Emu-myc transgenic mice: the immature B stage.                                                           |
| HOFFMANN_PRE_BI_TO_LARGE_PRE_BIL_LYMPHOCYTE_DN        | 46  | 0.206803 | 0.828817  | 0.6582 | 0.846368 | Genes down-regulated during differentiation from pre-Bi to large pre-Bil lymphocyte.                                                                                                                                        |
| MARKEY_RB1_ACUTE_LOF_DN                               | 168 | -0.12158 | -0.822695 | 0.6906 | 0.851246 | Genes down-regulated in adult fibroblasts with inactivated RB1 [Gene ID=5925] by Cre-lox: acute loss of function (LOF) of RB1.                                                                                              |
| BOYLAN_MULTIPLE_MYELOMA_C_D_UP                        | 113 | 0.141043 | 0.810753  | 0.7252 | 0.860925 | Genes up-regulated both in group C and D of tumors arising from overexpression of BCL2L1 and MYC [Gene ID=598, 4609] in plasma cells.                                                                                       |
| YAO_TEMPORAL_RESPONSE_TO_PROGESTERONE_CLUSTER_12      | 79  | 0.163756 | 0.8086    | 0.7199 | 0.860925 | Genes co-regulated in uterus during a time course response to progesterone [PubChem=5994]: SOM cluster 12.                                                                                                                  |
| RASHI_RESPONSE_TO_IONIZING_RADIATION_4                | 53  | -0.19098 | -0.806743 | 0.6998 | 0.860925 | Cluster 4: genes repressed by ionizing radiation regardless of ATM [Gene ID=472] status.                                                                                                                                    |
| TSENG_ADIPOGENIC_POTENTIAL_DN                         | 45  | 0.200527 | 0.80161   | 0.6962 | 0.863728 | Genes showing decreasing expression in brown preadipocytes with increasing ability of the cells to differentiate.                                                                                                           |
| YAO_HOXA10_TARGETS_VIA_PROGESTERONE_UP                | 74  | 0.161704 | 0.781399  | 0.7606 | 0.892004 | Genes up-regulated in the uteri of ovariectomized mice 6 h after progesterone [PubChem=5994] injection: HOXA10 [Gene ID=3206] knockout vs wild type animals.                                                                |
| LEE_LIVER_CANCER_MYC_E2F1_UP                          | 47  | -0.19077 | -0.770826 | 0.7456 | 0.896487 | Genes up-regulated in hepatocellular carcinoma (HCC) from MYC and E2F1 [Gene ID=4609, 1869] double transgenic mice.                                                                                                         |
| LEE_LIVER_CANCER_MYC_TGFA_DN                          | 50  | 0.185616 | 0.764475  | 0.7567 | 0.896487 | Genes down-regulated in hepatocellular carcinoma (HCC) tissue of MYC and TGFA [Gene ID=4609, 7039] double transgenic mice.                                                                                                  |
| YAO_TEMPORAL_RESPONSE_TO_PROGESTERONE_CLUSTER_6       | 55  | 0.178436 | 0.763676  | 0.7699 | 0.896487 | Genes co-regulated in uterus during a time course response to progesterone [PubChem=5994]: SOM cluster 6.                                                                                                                   |
| LEE_LIVER_CANCER_CIPROFIBRATE_UP                      | 54  | -0.18011 | -0.763223 | 0.7611 | 0.896487 | Genes up-regulated in hepatocellular carcinoma (HCC) induced by ciprofibrate [PubChem=2763].                                                                                                                                |
| ICHIBA_GRAFT_VERSUS_HOST_DISEASE_35D_DN               | 53  | -0.1763  | -0.745499 | 0.7873 | 0.90962  | Hepatic graft versus host disease (GVHD), day 35: genes down-regulated in allogeneic vs syngeneic bone marrow transplant.                                                                                                   |
| HOFFMANN_LARGE_TO_SMALL_PRE_BIL_LYMPHOCYTE_DN         | 38  | 0.19863  | 0.743046  | 0.7732 | 0.90962  | Genes down-regulated during differentiation from large pre-Bil to small pre-Bil lymphocyte.                                                                                                                                 |
| LEE_LIVER_CANCER_MYC_TGFA_UP                          | 76  | 0.152793 | 0.742244  | 0.817  | 0.90962  | Genes up-regulated in hepatocellular carcinoma (HCC) tissue of MYC and TGFA [Gene ID=4609, 7039] double transgenic mice.                                                                                                    |
| CADWELL_ATG16L1_TARGETS_DN                            | 56  | -0.17073 | -0.735945 | 0.8057 | 0.90962  | Genes down-regulated in Paneth cell (part of intestinal epithelium) of mice with hypomorphic (reduced function) form of ATG16L1 [Gene ID=55054].                                                                            |
| MONNIER_POSTRADIATION_TUMOR_ESCAPE_DN                 | 226 | -0.09468 | -0.733817 | 0.8055 | 0.90962  | The postirradiation tumor escape signature: genes down-regulated in tumors from irradiated stroma vs those from non-irradiated stroma.                                                                                      |
| MARTORIATI_MDMA_TARGETS_NEUROEPITHELIUM_DN            | 70  | -0.15481 | -0.727634 | 0.8285 | 0.90989  | Genes down-regulated in apoptotic tissues (neuroepithelium) after MDMA [Gene ID=4194] knockout.                                                                                                                             |
| LEE_LIVER_CANCER_E2F1_UP                              | 60  | 0.164545 | 0.725058  | 0.8177 | 0.90989  | Genes up-regulated in hepatocellular carcinoma (HCC) induced by overexpression of E2F1 [Gene ID=1869].                                                                                                                      |
| MORI_IMMATURE_B_LYMPHOCYTE_DN                         | 44  | 0.181019 | 0.714206  | 0.8185 | 0.917726 | Down-regulated genes in the B lymphocyte developmental signature based on expression profiling of lymphomas from the Emu-myc transgenic mice: the immature B stage.                                                         |
| BREDEMEYER_RAG_SIGNALING_NOT_VIA_ATM_DN               | 66  | -0.15331 | -0.702577 | 0.8551 | 0.917726 | Genes down-regulated in pre B lymphocyte after induction of physiological DNA double-strand breaks (DSB) by RAG2 [Gene ID=5897]; the changes are independent of ATM [Gene ID=472] signaling.                                |
| KHETCHOUMIAN_TRIM24_TARGETS_UP                        | 72  | -0.14845 | -0.702286 | 0.8584 | 0.917726 | Retinoic acid-responsive genes up-regulated in hepatocellular carcinoma (HCC) samples of TRIM24 [Gene ID=8805] knockout mice.                                                                                               |
| UEDA_CENTRAL_CLOCK                                    | 74  | 0.145538 | 0.698146  | 0.8725 | 0.917726 | Molecular timetable composed of 96 time-indicating genes (103 probes) in the central (suprachiasmatic nucleus [SCN]) clock.                                                                                                 |
| BOYLAN_MULTIPLE_MYELOMA_PC3A_DN                       | 67  | -0.15019 | -0.692176 | 0.8733 | 0.917726 | Top down-regulated genes from principal component 3 which captures variation among different plasma cell tumors arising from overexpression of BCL2L1 and MYC [Gene ID=598, 4609].                                          |
| RIZ_ERYTHROID_DIFFERENTIATION_12HR                    | 50  | -0.16556 | -0.682651 | 0.8612 | 0.917726 | Selected genes down-regulated in the TLX1 [Gene ID=3195] Tet On IEHDX15-4 cells (pro-erythroblasts) at 12 h time point.                                                                                                     |
| CAIRO_LIVER_DEVELOPMENT_DN                            | 165 | -0.1009  | -0.680595 | 0.8753 | 0.917726 | Genes down-regulated at early fetal liver stage (embryonic days E11.5 - E12.5) compared to the late fetal liver stage (embryonic days E14.5 - E16.5).                                                                       |
| MORI_MATURE_B_LYMPHOCYTE_UP                           | 63  | 0.150014 | 0.67712   | 0.8876 | 0.917726 | Up-regulated genes in the B lymphocyte developmental signature, based on expression profiling of lymphomas from the Emu-myc transgenic mice: the mature B                                                                   |
| MORI_MATURE_B_LYMPHOCYTE_DN                           | 60  | -0.15255 | -0.67592  | 0.8802 | 0.917726 | Down-regulated genes in the B lymphocyte developmental signature, based on expression profiling of lymphomas from the Emu-myc transgenic mice: the mature B                                                                 |
| LEE_LIVER_CANCER_ACOX1_DN                             | 51  | -0.15503 | -0.64571  | 0.9047 | 0.943097 | Genes down-regulated in hepatocellular carcinoma of ACOX1 [Gene ID=51] knockout mice.                                                                                                                                       |
| MARKEY_RB1_CHRONIC_LOF_DN                             | 101 | 0.131955 | 0.623252  | 0.9441 | 0.954948 | Genes down-regulated in MEF cells (embryonic fibroblasts) isolated from RB1 [Gene ID=5925] knockout mice: chronic loss of function (LOF) of RB1.                                                                            |
| RASHI_RESPONSE_TO_IONIZING_RADIATION_6                | 70  | 0.131308 | 0.619058  | 0.9444 | 0.954948 | Cluster 6: late responding genes activated in ATM [Gene ID=472] deficient but not in the wild type tissues.                                                                                                                 |
| BYSTRYKH_HEMATOPOIESIS_STEM_CELL_AND_BRAIN_QTL_TRANS  | 139 | -0.09692 | -0.606859 | 0.9438 | 0.958625 | Genes trans-regulated by the same QTL (quantitative trait loci) in brain and hematopoietic stem cells (HSC).                                                                                                                |
| IWANAGA_CARCIINOGENESIS_BY_KRAS_PTFEN_UP              | 174 | -0.085   | -0.587063 | 0.9567 | 0.966518 | Cluster 1: genes up-regulated in lung tissue samples from mice with oncogenic form of KRAS [Gene ID=3845] and inactivated PTEN [Gene ID=5728].                                                                              |
| LEE_LIVER_CANCER_DENA_DN                              | 54  | -0.116   | -0.493779 | 0.9947 | 0.995454 | Genes down-regulated in hepatocellular carcinoma (HCC) induced by diethylnitrosamine (DENA) [PubChem=5921].                                                                                                                 |
| LEE_LIVER_CANCER_CIPROFIBRATE_DN                      | 49  | -0.11516 | -0.474371 | 0.9997 | 0.995454 | Genes down-regulated in hepatocellular carcinoma (HCC) induced by ciprofibrate [PubChem=2763].                                                                                                                              |
